# Supplementary material for: Inorganic Agents for Enhanced Angiogenesis of Orthopedic Biomaterials
Source: PubMed Central journal article supplement (PMC11469191; doi:10.1002/adhm.202002254), 2021-05-26
Supplement: ADHM-10-2002254-s001.pdf [file ADHM-10-2002254-s001.pdf]

# ADVANCED HEALTHCARE MATERIALS

## Supporting Information

for *Adv. Healthcare Mater.*, DOI: 10.1002/adhm.202002254

Inorganic agents for enhanced angiogenesis of orthopaedic biomaterials

*M. Šalandová<sup>1</sup>, I.A.J. van Hengel<sup>1\*</sup>, I. Apachitei<sup>1</sup>, A.A. Zadpoor<sup>1</sup>,  
B.C.J. van der Eerden<sup>2#</sup>, L.E. Fratila-Apachitei<sup>1\*#</sup>*

## Supplementary figures

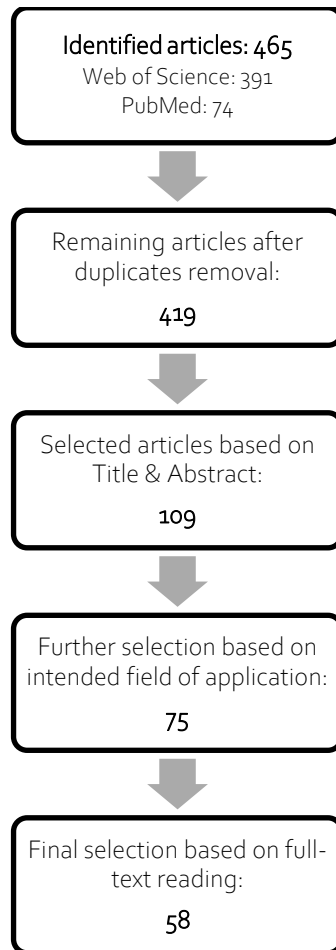

*Figure S1. Flowchart presenting the literature screening process.*
